# Supplementary material for: Efficacy and safety of teriparatide vs. bisphosphonates and denosumab vs. bisphosphonates in osteoporosis not previously treated with bisphosphonates: a systematic review and meta-analysis of randomized controlled trials
Source: PubMed Central journal article supplement (PMC11420281; doi:10.1007/s11657-024-01447-7), 2024-09-23
Supplement: 11657_2024_1447_MOESM1_ESM.pdf [file 11657_2024_1447_MOESM1_ESM.pdf]

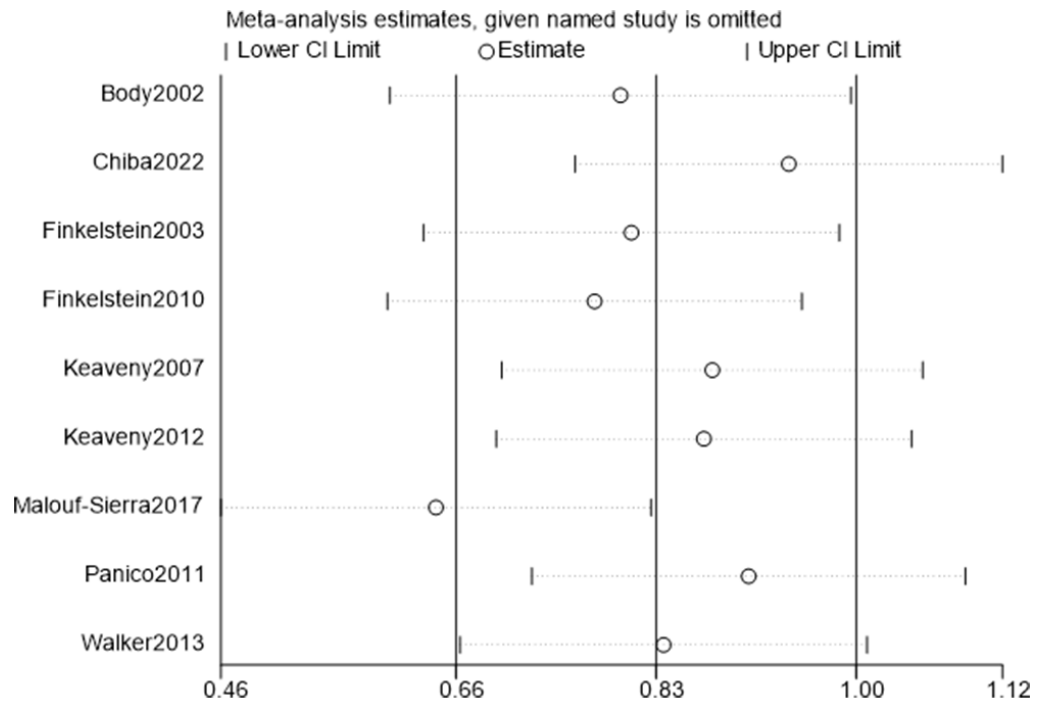

**Fig. S1.** Sensitivity analysis for comparing teriparatide versus bisphosphonates in percent changes at femoral neck BMD.

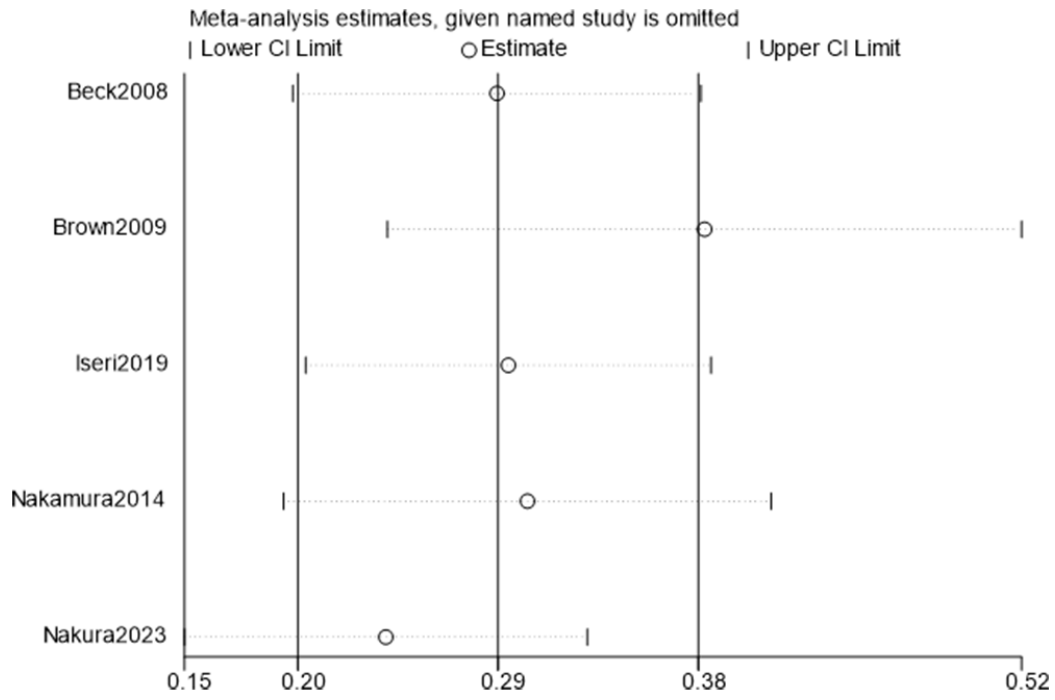

**Fig. S2.** Sensitivity analysis for comparing denosumab versus bisphosphonates in percent changes at femoral neck BMD.

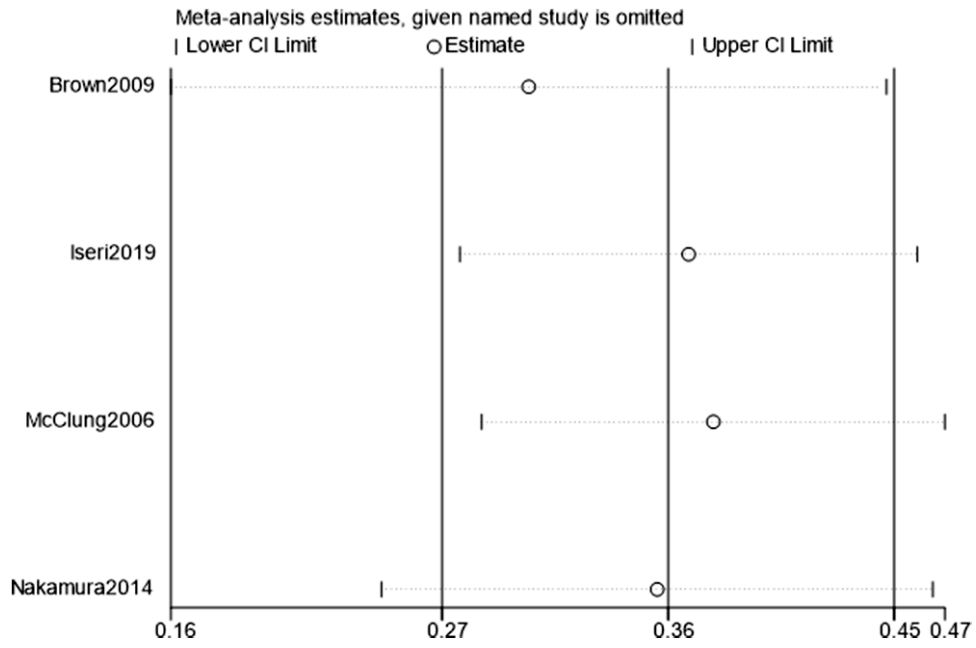

**Fig. S3.** Sensitivity analysis for comparing teriparatide versus bisphosphonates in percent changes at total hip BMD.

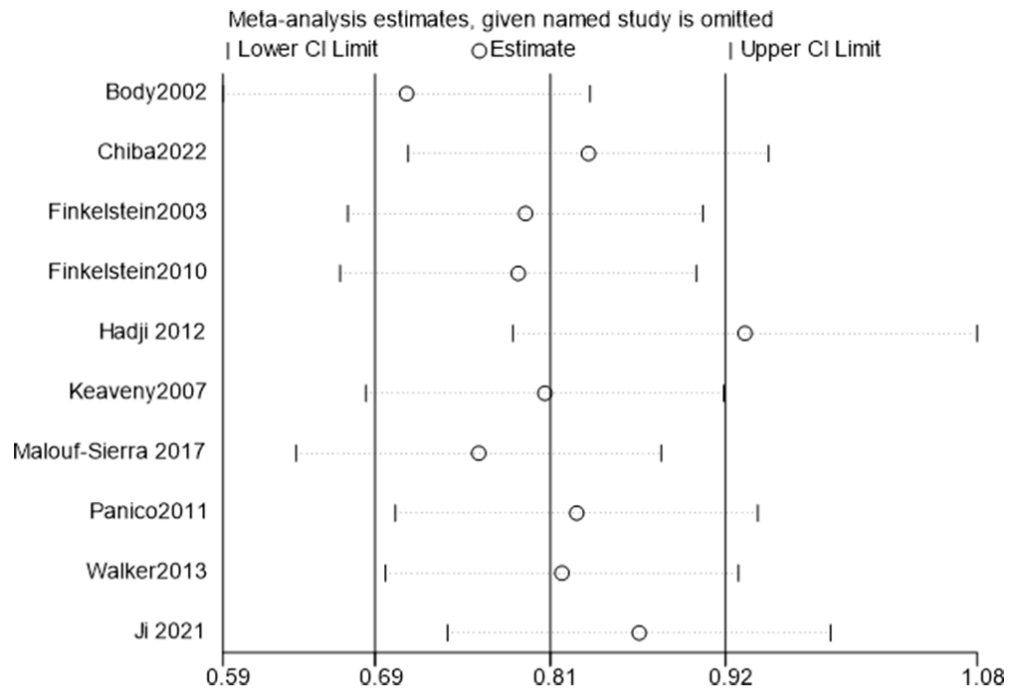

**Fig. S4.** Sensitivity analysis for comparing teriparatide versus bisphosphonates in percent changes at lumbar spine BMD.

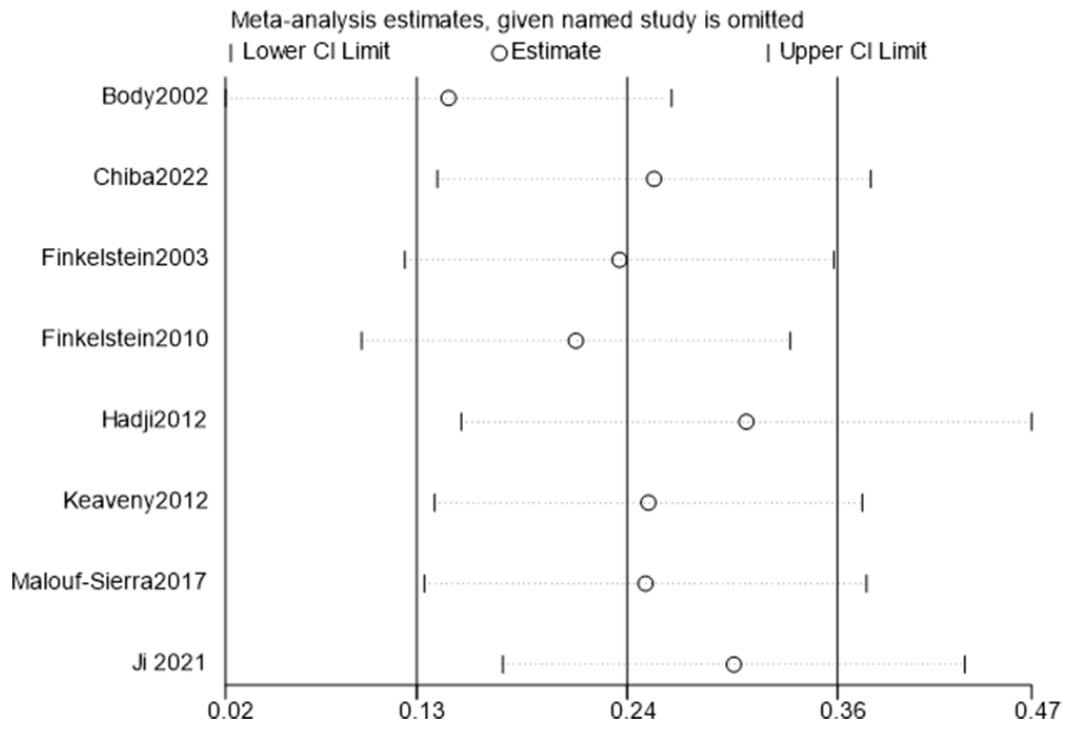

**Fig. S5.** Sensitivity analysis for comparing denosumab ver-sus bisphosphonates in percent changes at lumbar spine BMD.

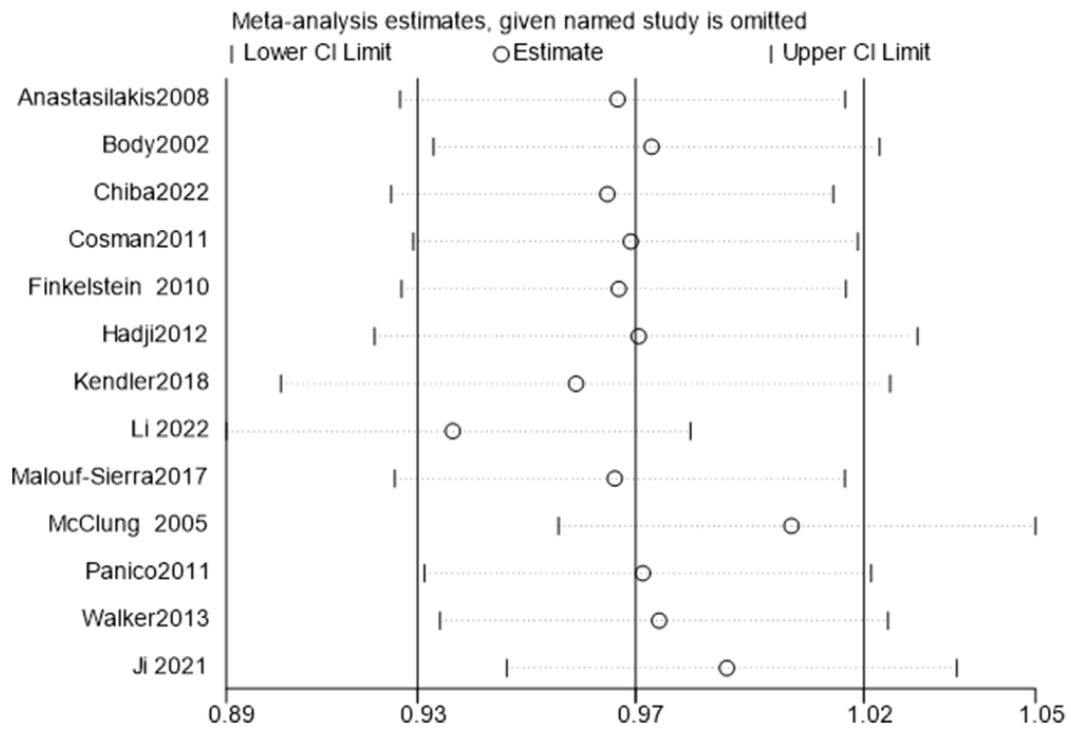

**Fig. S6.** Sensitivity analysis for comparing teriparatide versus bisphosphonates in the incidence of adverse events.

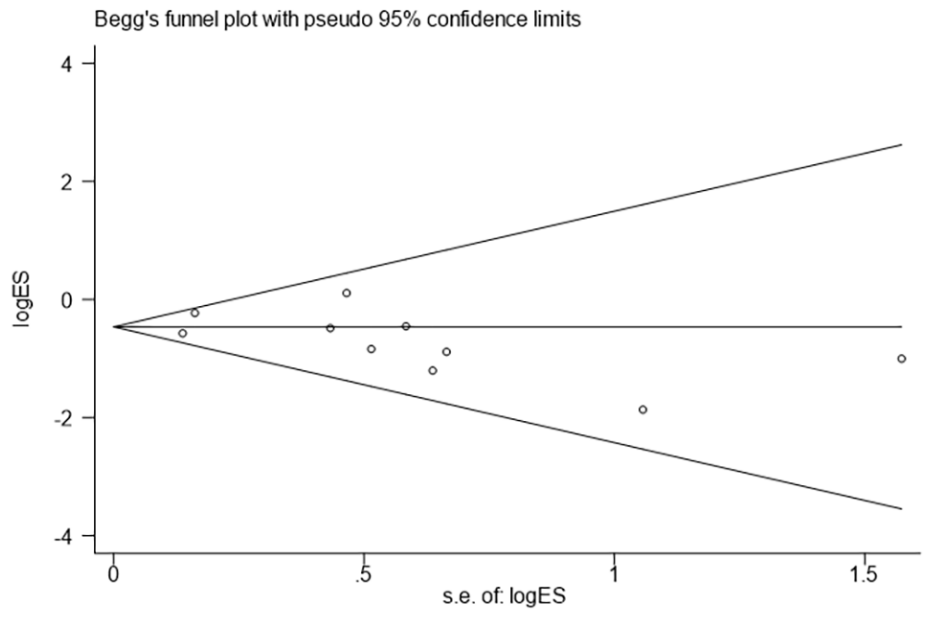

**Fig. S7.** Begg's test for incidence of risk of fracture. **Fig. S8.** Egger's test for incidence of risk of fracture.

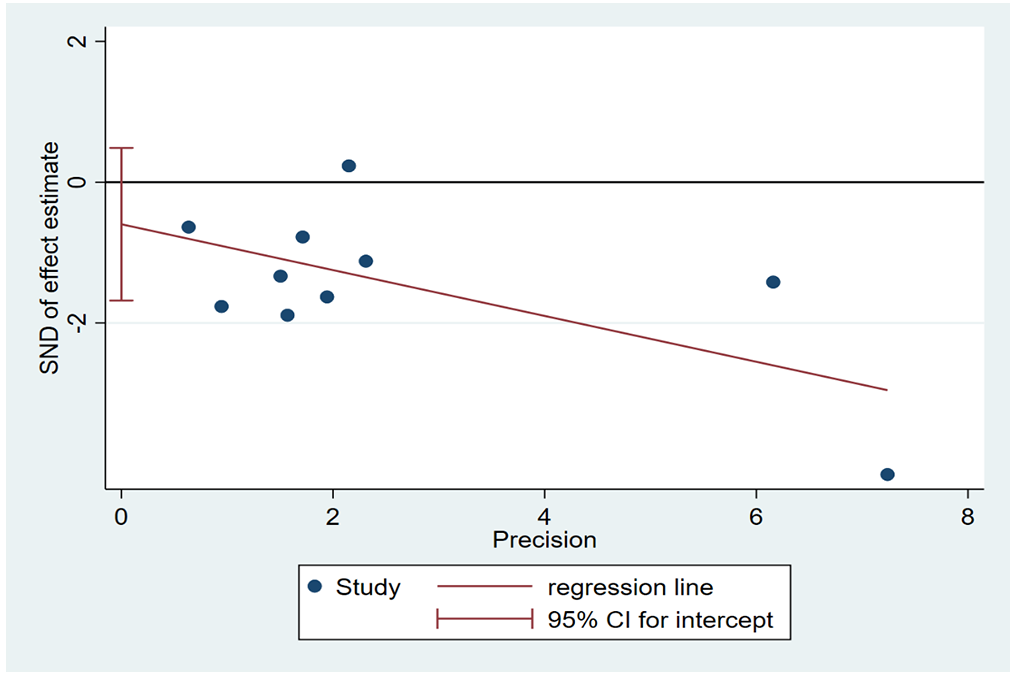

**Fig. S8.** Egger's test for incidence of risk of fracture.



**TABLES 1.** Search Strategy

| <b>Database</b>  | <b>Search Strategy</b>                                                                                                                                                                                                                                                                                                                                | <b>Results</b> |
|------------------|-------------------------------------------------------------------------------------------------------------------------------------------------------------------------------------------------------------------------------------------------------------------------------------------------------------------------------------------------------|----------------|
| PubMed           | #1 "Osteoporosis" [Mesh]<br>#2 "Osteoporosis entry terms" [All fields]<br>#3 #1 OR#2<br>#4 "Teriparatide" [Mesh]<br>#5 "Teriparatide entry terms" [All fields]<br>#6 #4 OR#5<br>#7 "Denosumab" [Mesh]<br>#8 "Denosumab entry terms" [All fields]<br>#9 #7 OR#8<br>#10 #6 OR #9<br>#11 #3AND #10<br>#12 #11AND randomized controlled trial             | 371            |
| Embase           | #1 'Osteoporosis'/exp<br>#2 'Osteoporosis synonyms'/all fields<br>#3 #1 OR#2<br>#4 'Teriparatide'/exp<br>#5 'Teriparatide synonyms'/all fields<br>#6 #4 OR#5<br>#7 'Denosumab'/exp<br>#8 'Denosumab synonyms'/all fields<br>#9 #7 OR#8<br>#10 #6 OR #9<br>#11 #3AND #10<br>#12 #11AND randomized controlled trial                                     | 713            |
| Cochrane Library | #1 Mesh descriptor: [Osteoporosis]<br>#2 (Osteoporosis synonyms): ti,ab,kw<br>#3 #1 OR#2<br>#4 Mesh descriptor: [Teriparatide]<br>#5 (Teriparatide synonyms): ti,ab,kw<br>#6 #4 OR#5<br>#7 Mesh descriptor: [Denosumab]<br>#8 (Denosumab synonyms): ti,ab,kw<br>#9 #7 OR#8<br>#10 #6 OR #9<br>#11 #3AND #10<br>#12 #11AND randomized controlled trial | 1115           |

---
